# Supplementary material for: Efficacy of dihydroxy-mercaptopyrimidine functionalized polymeric resin for the trace determination of Cd by SPE coupled flame atomic absorption spectrometry
Source: Royal Society of Chemistry journal article supplement (doi:10.1039/c5ra03163j), 2015-01-01
Supplement: c5ra03163j1.pdf [file c5ra03163j1.pdf]

### Electronic Supplementary Information

**Efficacy of dihydroxy-mercaptopyrimidine functionalized polymeric resin for the trace determination of Cd in commonly consumed samples by SPE coupled atomic absorption spectrometry**

**Aminul Islam\*, Noushi Zaidi, Hilal Ahmad, Suneel Kumar**

Analytical Research Laboratory, Department of Chemistry, Aligarh Muslim University, Aligarh,  
India-202 002

#### Contents

ESI graphics 1. TGA/DTA curve showing thermal behavior of PTB.

ESI graphics 2. Plot of sorption capacity vs. time showing effect of contact time on sorption of  
Cd by PTB.

ESI graphics 3. Langmuir sorption isotherm.

ESI graphics 4. Freundlich sorption isotherm.

ESI Table 1.  $R_L$  values for Cd sorption obtained from Langmuir constant  $K_b$ .

---

\*Corresponding author: Analytical Research Laboratory, Department of Chemistry, Aligarh Muslim University,  
Aligarh, India -202 002 Tel.: +91 9358979659; E-mail address: aminulislam.ch@amu.ac.in

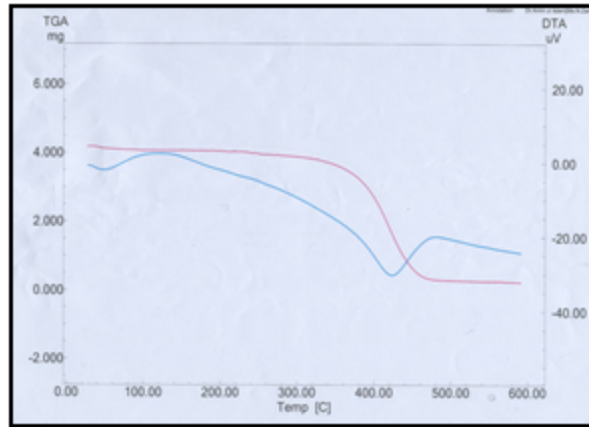

ESI graphics 1. TGA/DTA curve showing thermal behavior of PTB.

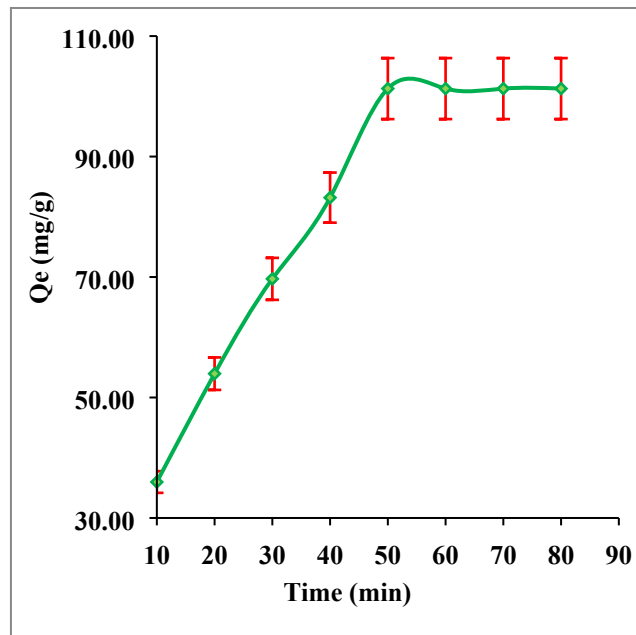

ESI graphics 2. Plot of sorption capacity vs. time showing effect of contact time on sorption of Cd by PTB.

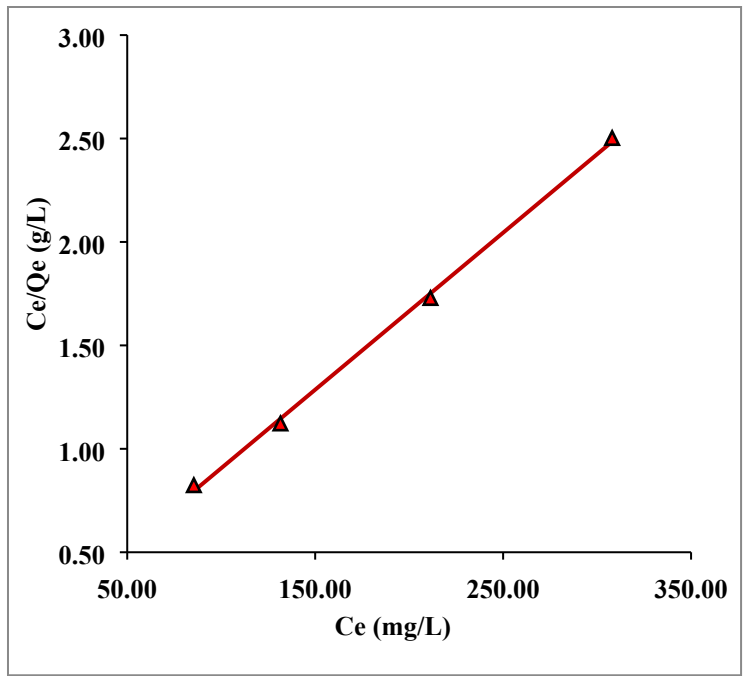

ESI graphics 3. Langmuir sorption isotherm.

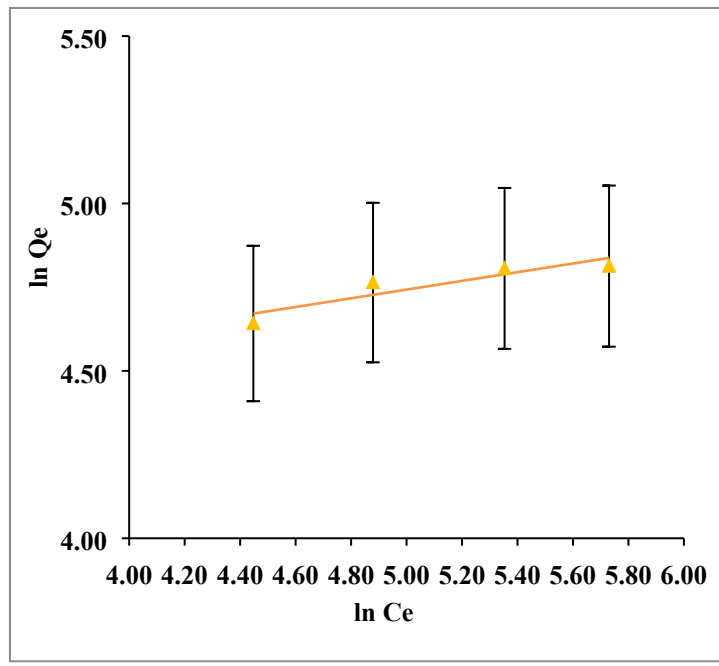

ESI graphics 4. Freundlich sorption isotherm.

**Table S1**  $R_L$  values for Cd sorption obtained from Langmuir constant  $K_b$

| $C_o$ | 500  | 600  | 700  | 800  |
|-------|------|------|------|------|
| $R_L$ | 0.04 | 0.03 | 0.03 | 0.02 |
